# Supplementary material for: Pregnancy after living kidney donation, a systematic review of the available evidence, and a review of the current guidance
Source: PubMed Central journal article supplement (PMC9804926; doi:10.1111/ajt.17122), 2022-08-03
Supplement: AJT-22-2360-s001.pdf [file AJT-22-2360-s001.pdf]

**Data extraction form: Pregnancy after living kidney donation, a systematic review and meta-analysis of the available evidence and a review of the current guidance.**

Question to be addressed: *Are living kidney donors at an increased risk of pregnancy induced complications following a donor nephrectomy, compared to the risks of pregnancy induced complications in healthy women who have not undergone a donor nephrectomy?*

This data extraction form has been adapted from the Cochrane Consumers and Communication Group Data extraction template for included studies<sup>1</sup>.

Please highlight any missing information as unclear or not described, to make it clear that the information was not included in the description of the study.

The inclusion criteria for the systematic review (and therefore data extraction) are as follows:

1. Population of interest: Living kidney donors with a post-donation pregnancy
2. Outcomes of interest: Pregnancy induced complications including but not limited too; gestational hypertension, gestational diabetes, pre-eclampsia, eclampsia, proteinuria
3. No limit on the follow-up time

If we proceed to a meta-analysis, then this will be performed on the studies which also include a comparator group. The comparator group(s) are living kidney donors with a post-donation pregnancy or healthy controls.

### 1. General information

|    |                                          |  |
|----|------------------------------------------|--|
| 1. | Date of form completed                   |  |
| 2. | Name of person completing form           |  |
| 3. | Name of study (First_author_year)        |  |
| 4. | Publication date (year)                  |  |
| 5. | Country in which the study was conducted |  |

### 2. Methods: Population and setting

|     |                                                                                  | Descriptions as stated in the report/paper | Location in text |
|-----|----------------------------------------------------------------------------------|--------------------------------------------|------------------|
| 6.  | Aim of the study                                                                 |                                            |                  |
| 7.  | Study design (e.g., cross-sectional study, cohort study, before and after study) |                                            |                  |
| 8.  | Population description (from which study participants are drawn)                 |                                            |                  |
| 9.  | Number of arms or groups (including control groups); briefly describe each group |                                            |                  |
| 10. | Geographic location i.e., country, rural, urban etc.                             |                                            |                  |
| 11. | Number of transplant centres included in study                                   |                                            |                  |

|        |                                                           |  |  |
|--------|-----------------------------------------------------------|--|--|
| 12.    | Data source(s)                                            |  |  |
| 13.    | Sampling technique (e.g., random or whole LKD population) |  |  |
| 14.    | Period of kidney donation                                 |  |  |
| 15.    | Period of pregnancies                                     |  |  |
| 16.    | If survey: % of responders                                |  |  |
| Notes: |                                                           |  |  |

### 3. Results: Participant characteristics

|        |                                                                                                                                               | Descriptions as stated in the report/paper |          |          |          | Location in text |
|--------|-----------------------------------------------------------------------------------------------------------------------------------------------|--------------------------------------------|----------|----------|----------|------------------|
|        |                                                                                                                                               | Group 1:                                   | Group 2: | Group 3: | Group 4: |                  |
| 17.    | Description groups e.g., group 1= LKD pre-donation, group 2= LKD post-donation, group 3= healthy control etc. (add more columns if necessary) |                                            |          |          |          |                  |
| 18.    | Total number of participants per group (n)                                                                                                    |                                            |          |          |          |                  |
| 19.    | Total number of pregnancies per group (n)                                                                                                     |                                            |          |          |          |                  |
| 20.    | Median age at donation (yr)                                                                                                                   |                                            |          |          |          |                  |
| 21.    | Median age at pregnancy of interest (yr)                                                                                                      |                                            |          |          |          |                  |
| 22.    | Median time from donation to pregnancy (yr)                                                                                                   |                                            |          |          |          |                  |
| 23.    | BMI (kg/m <sup>2</sup> )                                                                                                                      |                                            |          |          |          |                  |
| 24.    | eGFR (ml/min/1.73m <sup>2</sup> )                                                                                                             |                                            |          |          |          |                  |
| 25.    | Ethnicity (% white)                                                                                                                           |                                            |          |          |          |                  |
| Notes: |                                                                                                                                               |                                            |          |          |          |                  |

### 4. Outcomes

|  | Descriptions as stated in the report/paper | Location in text |
|--|--------------------------------------------|------------------|
|--|--------------------------------------------|------------------|

|                                                                  |                                                                  |  |  |
|------------------------------------------------------------------|------------------------------------------------------------------|--|--|
| 26.                                                              | How were outcomes reported?                                      |  |  |
| 27.                                                              | Please highlight key findings<br>i.e., RR of XX for group x vs y |  |  |
| Notes: **Please highlight the primary outcome if this was stated |                                                                  |  |  |

## 5. Results: Maternal Outcomes

| Maternal outcomes, N* (%)<br>*if other please state |                                                        | Descriptions as stated in the report/paper |          |          |          | Location<br>in text |
|-----------------------------------------------------|--------------------------------------------------------|--------------------------------------------|----------|----------|----------|---------------------|
|                                                     |                                                        | Group 1:                                   | Group 2: | Group 3: | Group 4: |                     |
| 28.                                                 | Proteinuria                                            |                                            |          |          |          |                     |
| 29.                                                 | Gestational hypertension                               |                                            |          |          |          |                     |
| 30.                                                 | Pre-eclampsia                                          |                                            |          |          |          |                     |
| 31.                                                 | Eclampsia                                              |                                            |          |          |          |                     |
| 32.                                                 | Pre-eclampsia and gestational<br>hypertension combined |                                            |          |          |          |                     |
| 33.                                                 | Gestational diabetes                                   |                                            |          |          |          |                     |
| 34.                                                 | Death                                                  |                                            |          |          |          |                     |
| 35.                                                 | Other:                                                 |                                            |          |          |          |                     |
| Notes:                                              |                                                        |                                            |          |          |          |                     |

## 6. Results: Foetal Outcomes

| Foetal outcomes, N (%)<br>*if other please state |                                      | Descriptions as stated in the report/paper |          |          |          | Location<br>in text |
|--------------------------------------------------|--------------------------------------|--------------------------------------------|----------|----------|----------|---------------------|
|                                                  |                                      | Group 1:                                   | Group 2: | Group 3: | Group 4: |                     |
| 36.                                              | Pre-term birth (gestation<br><37/40) |                                            |          |          |          |                     |
| 37.                                              | Birth weight <2500 g                 |                                            |          |          |          |                     |
| 38.                                              | Still birth                          |                                            |          |          |          |                     |
| 39.                                              | Death <28 days after birth           |                                            |          |          |          |                     |
| 40.                                              | Other:                               |                                            |          |          |          |                     |
| Notes:                                           |                                      |                                            |          |          |          |                     |

## 7. Limitation and mitigation strategy

|        |                                                                             | Descriptions as stated in the report/paper | Location in text |
|--------|-----------------------------------------------------------------------------|--------------------------------------------|------------------|
| 41.    | Strength                                                                    |                                            |                  |
| 42.    | Limitation                                                                  |                                            |                  |
| 43.    | Strategies to overcome the limitation                                       |                                            |                  |
| 44.    | Bias; please mention any potential biases you have identified in this study |                                            |                  |
| Notes: |                                                                             |                                            |                  |

## 8. Conclusion and other information

|        |                                  | Descriptions as stated in the report/paper | Location in text |
|--------|----------------------------------|--------------------------------------------|------------------|
| 45.    | Key conclusions of study authors |                                            |                  |
| Notes: |                                  |                                            |                  |

1. Ryan R, Synnot A, Prictor M, Hill S. Cochrane Consumers and Communication Group Data extraction template for included studies. CCCG <http://cccr.org/cochrane.org/author-resources>. La Trobe University, Melbourne. Published November 2016. Approved (S. Hill) November 29th 2016. Accessed 6<sup>th</sup> December 2018.
